# Supplementary material for: Network pharmacology approach to decipher signaling pathways associated with target proteins of NSAIDs against COVID-19
Source: PubMed Central journal article supplement (PMC8100301; doi:10.1038/s41598-021-88313-5), 2021-05-05

# Title Page

## Research article

### **Network pharmacology approach to decipher signaling pathways associated with target proteins of NSAIDs against COVID-19**

Ki Kwang Oh<sup>1</sup>, Md. Adnan<sup>1</sup>, Dong Ha Cho<sup>1\*</sup>

<sup>1</sup>Department of Bio-Health Convergence, College of Biomedical Science, Kangwon National University, Chuncheon, 24341, Korea

**\*Correspondence:** chodh@kangwon.ac.kr; Tel.: +82-33-250-6475

#### **Email of Authors:**

<sup>1</sup>Ki Kwang Oh (KKO): nivirna07@kangwon.ac.kr

<sup>1</sup>Md. Adnan (MA): mdadnan1991.pharma@gmail.com

<sup>1</sup>Dong Ha Cho (DHC): chodh@kangwon.ac.kr

**Running title:** Potential Non-Steroidal Anti-Inflammatory Drugs (NSAIDs) and novel mechanism against SARS-CoV-2

**Supplementary Figure S1.**

- (a) Interactions between three bioactive compounds and MAPK8.
- (b) Interactions between twelve bioactive compounds and MAPK10.
- (c) Interactions between two bioactive compounds and BAD.

**(a)**

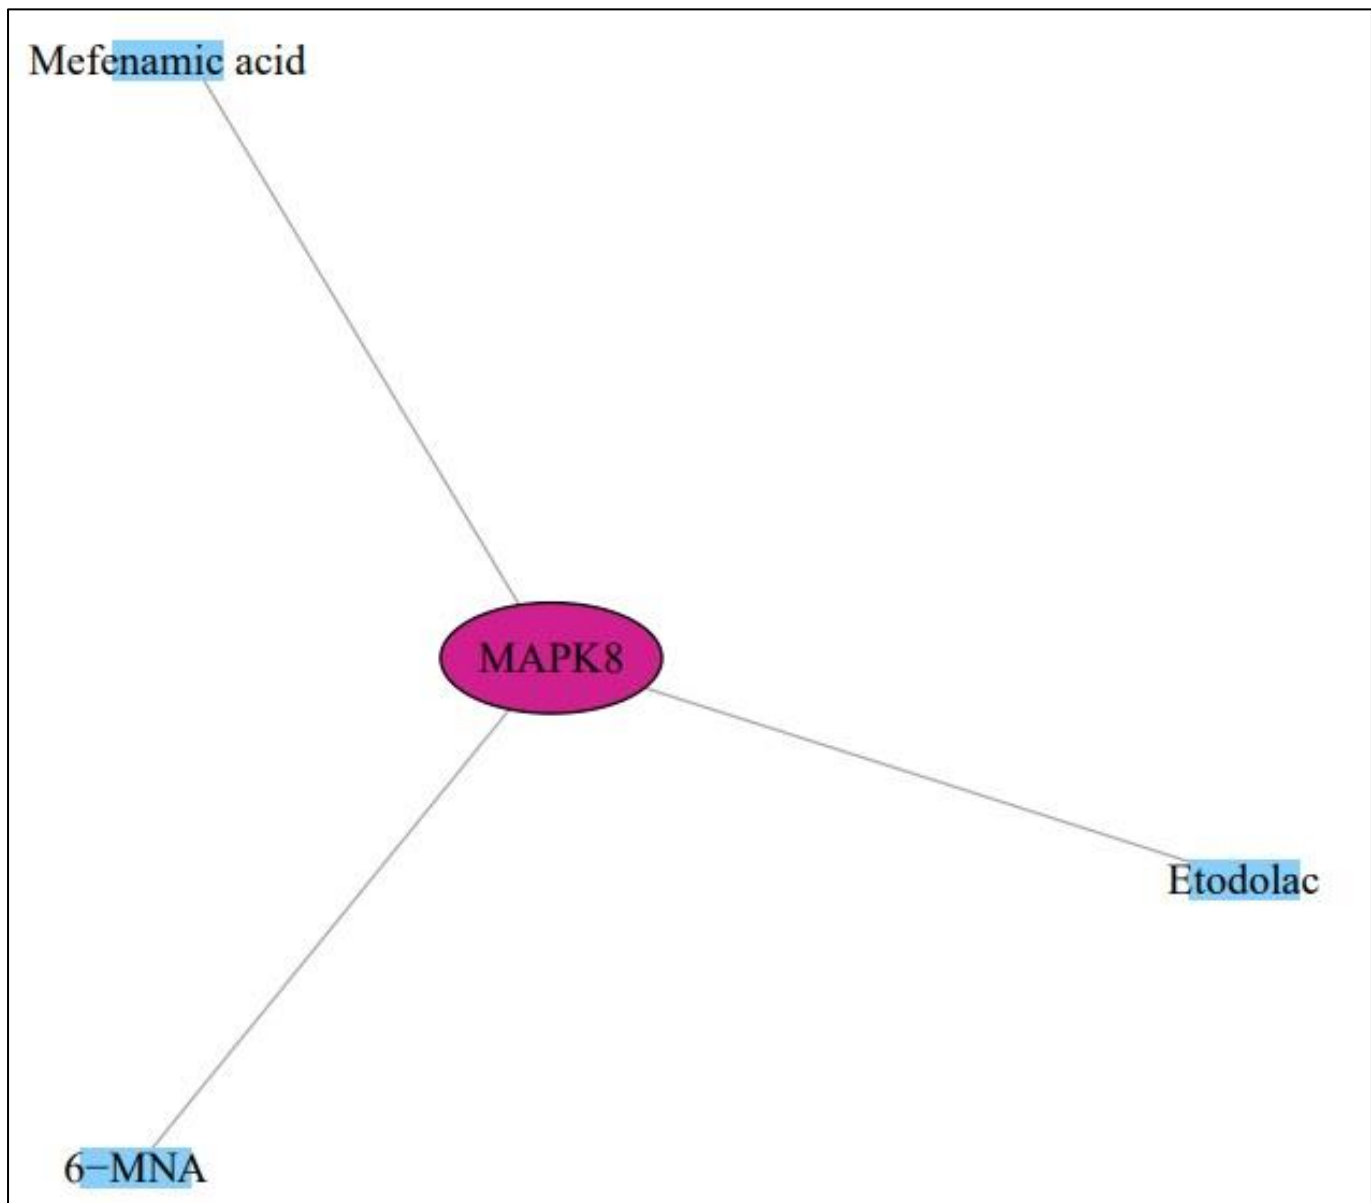

(b)

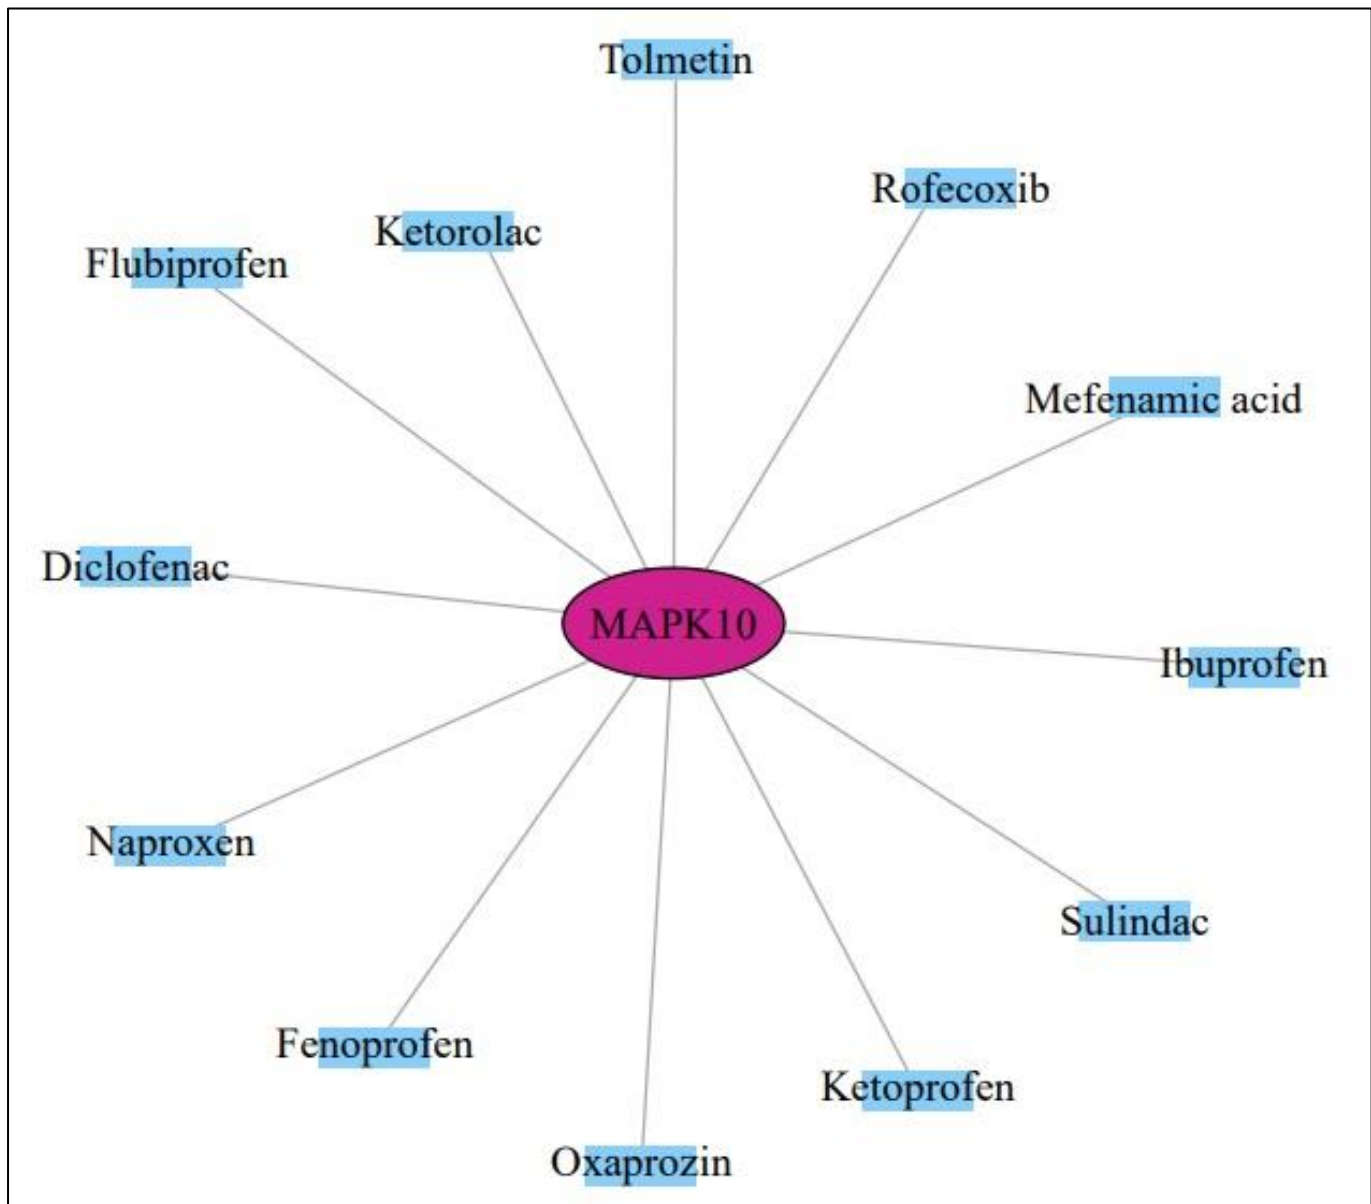

(c)

6-MNA

BAD

Indomethacin

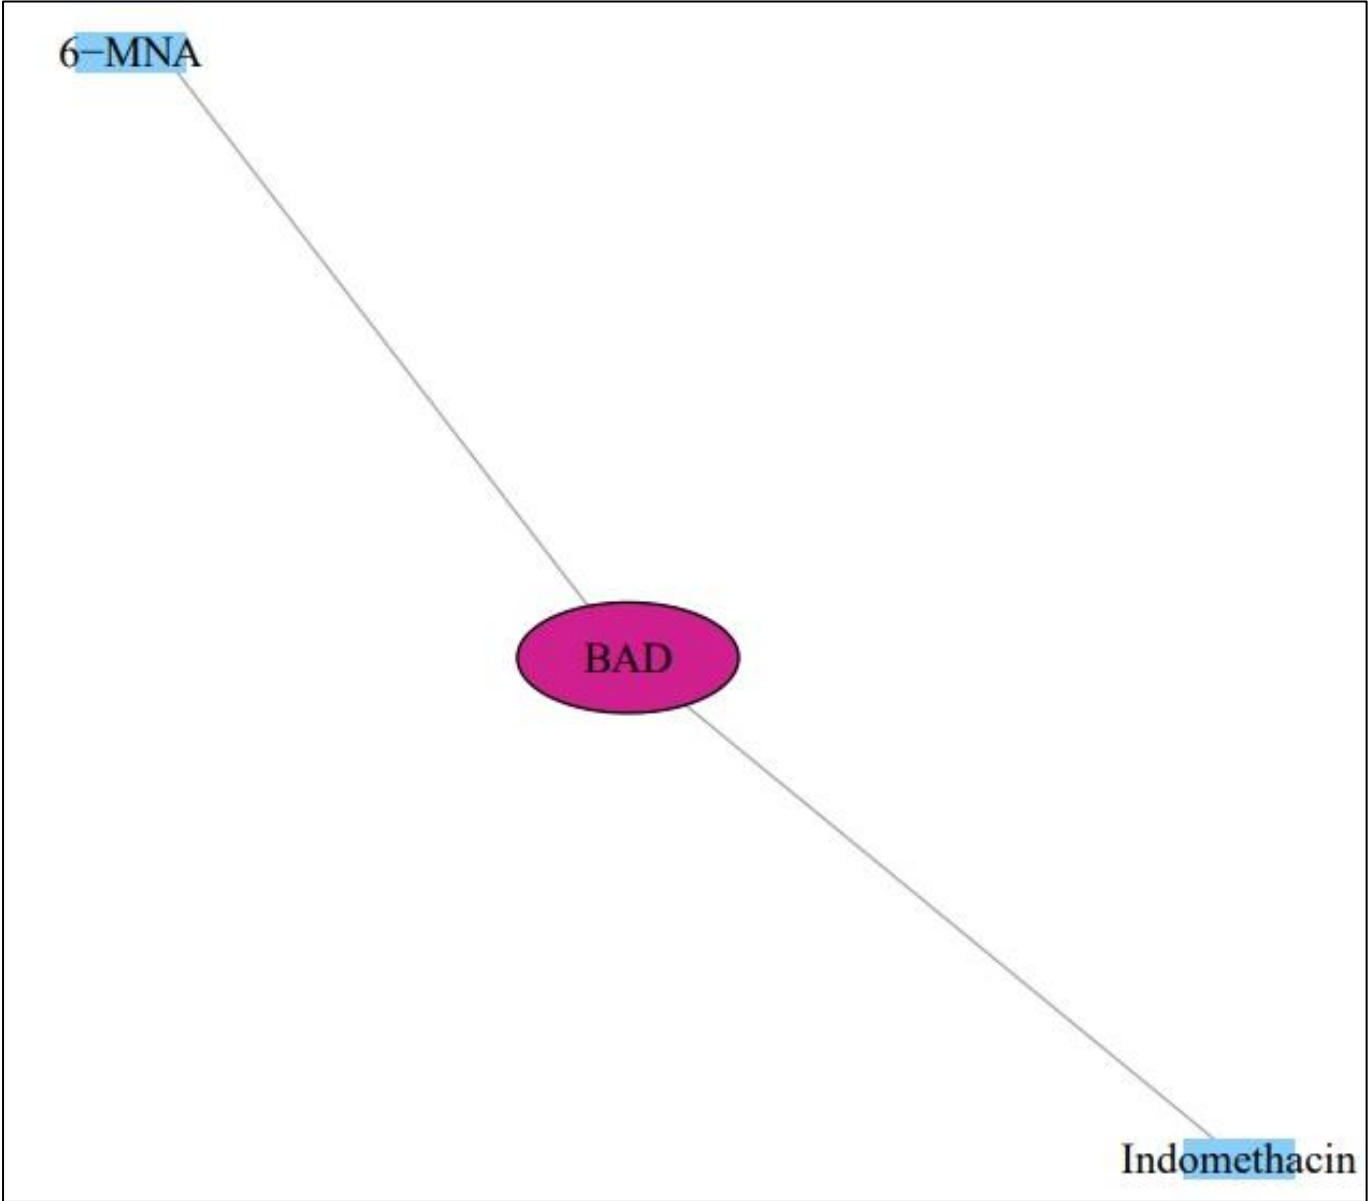

Supplement: 41598_2021_88313_MOESM1_ESM.pdf [file 41598_2021_88313_MOESM1_ESM.pdf]
