# Supplementary material for: Network pharmacology approach to decipher signaling pathways associated with target proteins of NSAIDs against COVID-19
Source: PubMed Central journal article supplement (PMC8100301; doi:10.1038/s41598-021-88313-5), 2021-05-05
Supplement: 41598_2021_88313_MOESM2_ESM.pdf [file 41598_2021_88313_MOESM2_ESM.pdf]

**A total of 781 target proteins related to NSAIDs in both SEA and STP databases**

PTGS2

CA9

CA12

CA2

CA5A

CA5B

CA14

CA6

CA4

CA13

CA3

CA7

ADRA2B

PTGES

MAPK14

CYP2D6

SLC6A2

SLC6A3

SLC6A4

PTGS1

CA1

RPA1

CRACR2A

ORAI1

MT-CO2

STIM1

CARM1

RXRA

RARG  
F10  
NR3C2  
CCKAR  
EPHX2  
NPY5R  
CHRNA7  
FPR1  
SLCO1B1  
SLC5A1  
PPP1CA  
RARB  
CXCL8  
TTR  
AKR1C3  
SLC22A6  
AKR1B10  
CXCR1  
CYP2C9  
AKR1C2  
SFN  
KCNQ2  
FTO  
FABP2  
CXCR2  
PTGER3  
KCNQ4  
PYGL  
CTSA

GRIK1  
SLC15A1  
TXNRD1  
AKR1C1  
KCNJ5  
TAS1R2  
SELP  
RPS6KB2  
MMP16  
KCNJ3  
EPHB3  
TAS1R3  
FABP5  
FABP4  
C1R  
SLC22A12  
S100B  
SELL  
KCNQ1  
THRA  
GPR139  
CDC42  
AKR1B1  
P2RX7  
PTGDR2  
FEN1  
THRB  
CASP6  
EGLN3

TAAR1  
KCNJ6  
FABP3  
LPAR2  
PLA2G1B  
PTPRG  
KCNK9  
TRPV1  
ERCC5  
IDO1  
DHODH  
EIF4E  
HSD3B2  
PRKAB2  
POLI  
ALOX5AP  
HSD17B1  
KMO  
CES2  
MPG  
POLH  
NR0B2  
PTPN22  
HSD17B14  
HSD17B2  
FUT7  
GSTA1  
NOTUM  
PRKAB1

MPL  
PRKAG1  
PHLPP2  
KCNMA1  
ACVR2B  
PTGER1  
ESR2  
EGLN2  
SLC2A4  
FFAR1  
GLI1  
ACPP  
LTA4H  
FDFT1  
ACACA  
MTNR1B  
CPA1  
ACE2  
SLC7A5  
GPR88  
PPARA  
PPARG  
ALOX5  
EGLN1  
MTNR1A  
CPN1  
PRKG2  
PRKG1  
MME

FAAH  
GRK3  
LPAR5  
PTGER4  
KYNU  
SCN4A  
CAPN2  
AOC3  
NR1H3  
MGLL  
PPARD  
ADRB3  
FFAR4  
MMP2  
CCR8  
CACNA1A  
CACNB1  
MMP9  
ACACB  
METAP1  
FNTB  
GCK  
MMP13  
PRKX  
SGK2  
FNTA  
F13A1  
LPAR3  
GAPDH

PKN2  
PLA2G10  
MCL1  
KAT2A  
PRKACA  
SRD5A2  
CETP  
NR1H2  
TSPO  
RHOA  
ACE  
CHRNA1  
CES1  
ROCK1  
GABRB1  
LPAR1  
CHRNA1  
CDC42BPA  
CHRNA1  
CASR  
RPS6KA5  
DAGLA  
CFTR  
MMP14  
CASP1  
EPHX1  
ADAMTS4  
CHRNA1  
S1PR2

NEK4  
ST6GAL1  
TAS1R1  
GSK3A  
MMP12  
MMP3  
BAD  
PRKCG  
AKT3  
MMP8  
CYP2C19  
LCT  
KCNN4  
SI  
GBA2  
MMEL1  
UGCG  
ADAM12  
GRIA4  
PRCP  
PTPN13  
MGAM  
CTL  
PTPRC  
CD274  
CTSK  
CTSB  
GBA  
SMAD3



CTSS  
NTSR1  
HMGCR  
PDK2  
PTGES2  
SLC1A1  
CPA3  
PDYN  
DNPEP  
RNPEP  
YARS  
ANPEP  
NAALAD2  
LAP3  
TH  
CSK  
FOLH1  
TPH1  
FCER2  
PAM  
CPB2  
CPB1  
S1PR5  
NPPA  
SOAT2  
MMP1  
SLC7A11  
S1PR4  
ENPEP

SLC22A8  
TBXAS1  
AR  
PLA2G2A  
PLA2G4A  
DUSP2  
PTGIR  
EWS-Fli1  
KLK14  
AKR1C4  
CPT1B  
CPT1A  
PTGDR  
CYSLTR2  
KLK5  
ACR  
SENP1  
LTC4S  
NQO2  
GPR183  
HTR6  
NPBWR1  
BAZ2A  
BAZ2B  
SSTR5  
SPR  
CYSLTR1  
GRIK2  
TUBB1

OXER1  
ELAVL1  
TBXA2R  
ACER2  
SLC18A2  
CHRN4  
SLC9A2  
CHRNA3  
PLAUR  
TRPM8  
KCNK3  
STS  
CHRNA4  
CHRN2  
KDM2A  
ELANE  
BCL2A1  
ADIPOR1  
ADIPOR2  
L3MBTL3  
PHGDH  
SLC6A1  
SLC6A7  
MPO  
CYP1A2  
CXCR5  
HCR2  
SORT1  
DDX3X

RXFP1  
NR4A1  
MAPK8  
TRPM2  
RCE1  
KDM4C  
CTBP2  
LIG1  
RBP4  
KDM6B  
HIPK2  
AGER  
GFER  
RAPGEF4  
NR1H4  
CTSV  
NPSR1  
DAPK3  
PMM2  
KDM4D  
CSNK1A1  
STK17A  
KDM4E  
IDE  
MAPK10  
SENP7  
UCHL1  
DYRK4  
FES

MATK  
ATG4B  
CDC7  
PAK4  
MAP4K2  
CSNK2A2  
GRM4  
CDK5  
CYP26A1  
HSD17B10  
CYP1B1  
ABCG2  
NFE2L2  
RYR2  
UTS2R  
SLC16A3  
ITGA3  
TOP2B  
CYP11B1  
RELA  
TAS2R14  
PDK4  
CYP1A1  
CYP11B2  
KDM2B  
MMP7  
PDK3  
BMP1  
EDNRA

EDNRB  
GRK6  
MAOB  
NFKB1  
RBBP9  
NCEH1  
APP  
MAPT  
TNFRSF1A  
KLF5  
HNF4A  
CALM1  
CYP17A1  
PHF8  
MITF  
SELE  
STAT1  
PLCG2  
PRNP  
G6PD  
ALPL  
PLAU  
NQO1  
LTB4R2  
CACNA1G  
CDC25C  
LTB4R  
APEX1  
GPR17

MMP10  
PRKAA2  
CDC25A  
PIN1  
SIRT5  
DBF4  
CDC25B  
SLC40A1  
GRM5  
SMN1  
SMN2  
CTSF  
UQCRB  
ATR  
ATM  
GLRA1  
BDKRB2  
NLRP1  
GABRA5  
BRD2  
NR4A2  
BRD3  
BRD4  
TAF1L  
MLYCD  
MCOLN3  
DKK1  
LDHB  
CACNA1C

LDHA  
TTK  
CYP27A1  
AGBL2  
HPSE  
SLC5A4  
PRUNE1  
QTRT1  
PLA2G4B  
CACNA1B  
SLC6A11  
G6PC  
PTPN1  
SLC1A5  
KEAP1  
UBE2I  
HDAC1  
CYP26B1  
ACHE  
HDAC8  
CYP3A4  
SGMS1  
PDE4D  
CYP24A1  
SOAT1  
GPBAR1  
HDAC6  
PDE4B  
CSNK1D



AHR  
WNK1  
PTPN2  
SIGMAR1  
KCNA5  
SLC2A1  
CTDSP1  
MAOA  
APOBEC3A  
ADAM17  
PTPN6  
SENP6  
GLS  
ABCB1  
SLC5A2  
ERAP2  
CAPN1  
SLC13A5  
IGFBP5  
PTGER2  
RNASEH1  
GRIN2B  
HDAC2  
CBFB  
NLRP3  
ASAH1  
P4HTM  
CHRM5  
KARS

CASP7  
GLO1  
DGAT1  
PLAT  
FLT3  
ADORA3  
EP300  
AADAT  
CLK1  
SCN3A  
CCR3  
PTPRB  
MAPK9  
FOS  
APOBEC3G  
HDAC3  
MIF  
BCHE  
HSD17B3  
JUN  
CASP3  
CNR1  
SENP8  
FPR2  
CNR2  
GPR55  
HKDC1  
PAX8  
PDGFRB

CYP19A1  
MCHR1  
DYRK2  
GRM2  
CHRM1  
PRSS1  
GSK3B  
TNIK  
PDPK1  
GABRB3  
TYMS  
LRRK2  
MTOR  
CCND1  
CCNE2  
CDK4  
KIF11  
SHH  
FLT1  
HRH1  
HRH4  
PIK3CA  
S1PR1  
PDE5A  
WNT3A  
AXIN2  
PARP1  
PARP2  
TNKS2

TNKS  
AURKB  
AGPAT2  
GABRA2  
PIM1  
GABRB2  
GABRG2  
GABRA3  
GABRA1  
CDK2  
CCNE1  
FABP1  
MAPK1  
HSPA1A  
BCAT2  
DYRK1A  
CSNK2A1  
GRK2  
ECE1  
ABCC1  
PLEC  
CCNC  
KDM4A  
PDE7A  
MKNK2  
MAP2K1  
KDM5C  
DAO  
AKR1A1

MAP3K8  
PARP15  
PARP10  
PYGM  
ITGB1  
METAP2  
PDE9A  
ITGAV  
MKNK1  
ICAM1  
GSTP1  
HAO2  
CDK8  
ITGA5  
ITGA2  
ERN1  
PKM  
ESR1  
CREBBP  
NEK2  
ITGAL  
GSR  
PPP5C  
DHFR  
MDM2  
OPRK1  
PSEN2  
OPRL1  
OPRM1

IMPDH2  
ADAMTS5  
EGFR  
PIK3CD  
PIK3CB  
TDO2  
PTPRF  
GPR35  
CMA1  
CTSG  
SCN10A  
VCP  
ADORA1  
DUSP3  
PSENEN  
NCSTN  
APH1A  
PSEN1  
APH1B  
ITGA4  
ITGB3  
ITGB2  
ITGA1  
PGR  
EPRS  
HSP90AA1  
CISD1  
SRD5A1  
KDM5A

KDM5B  
PDE10A  
SLC16A1  
ABAT  
YWHAG  
CCR2  
PIM2  
PDE4A  
CACNA2D1  
CAMKK1  
CAMKK2  
PIM3  
HAO1  
TOP1  
NOS2  
BCL2L1  
MC1R  
CD38  
MC4R  
PLA2G2E  
PLA2G2D  
PLA2G5  
HSD11B1  
TNNC1  
TNNT2  
TNNI3  
BCL2  
GRIN1  
CTSL

AGTR2  
AMPD3  
PFKFB3  
FGFR1  
KDR  
TYK2  
TERT  
CDK5R1  
PIK3CG  
ADORA2B  
PTK2B  
VEGFA  
SRC  
ALOX12  
ABL1  
PRKDC  
HCK  
PI4KB  
EPHB4  
RAF1  
DPP4  
CHEK1  
ADORA2A  
HTR2C  
CSF1R  
MAPKAPK2  
RPS6KA3  
MALT1  
RPS6KB1



AURKA  
SIRT1  
PSMB5  
IKBKB  
JAK3  
JAK1  
JAK2  
ROCK2  
IGF1R  
MAPK3  
VCAM1  
SYK  
PRKCA  
TDP2  
PREP  
HASPIN  
CDK9  
CHEK2  
NISCH  
CLK4  
CLK2  
QPCT  
DYRK3  
PPIA  
CSNK1G1  
RPS6KA1  
NOS1  
ITK  
PABPC1

CCR5  
TYMP  
KIT  
FLT4  
CCNT1  
ENPP2  
GYS1  
MET  
CTNNB1  
CNOT7  
ALK  
IDH1  
DRD1  
PGGT1B  
ROS1  
DYRK1B  
LIPE  
TKT  
F2  
HMOX1  
STAT3  
CYP2A6  
CTSC  
ALDH3A1  
AKT1  
HSP90B1  
RORC  
DRD2  
KCNA3

PIP4K2C  
PLG  
KLKB1  
CCNB3  
TGFBR1  
CDK1  
CCNB1  
CCNB2  
PLK1  
ITGB7  
MARS  
HSD11B2  
PDE4C  
KDM3A  
TEK  
HIF1A  
HTR2B  
HTR7  
NOS3  
C5AR1  
MAP3K7  
BRS3  
TLR9  
S1PR3  
AGTR1  
DCTPP1  
CCNA1  
CCNA2
