# Supplementary material for: Network pharmacology approach to decipher signaling pathways associated with target proteins of NSAIDs against COVID-19
Source: PubMed Central journal article supplement (PMC8100301; doi:10.1038/s41598-021-88313-5), 2021-05-05
Supplement: 41598_2021_88313_MOESM3_ESM.pdf [file 41598_2021_88313_MOESM3_ESM.pdf]

**228 overlapped target proteins between SEA and STP**

PTGS2

CA9

CA12

CA2

CA5A

CA5B

CA14

CA6

CA4

CA13

CA3

CA7

ADRA2B

PTGES

MAPK14

CYP2D6

SLC6A2

SLC6A3

SLC6A4

PTGS1

CA1

RPA1

MT-CO2

RXRA

NR3C2

CCKAR

EPHX2

NPY5R

SLCO1B1  
PPP1CA  
CXCL8  
TTR  
AKR1C3  
SLC22A6  
AKR1B10  
CXCR1  
AKR1C2  
FABP2  
PTGER3  
PYGL  
CTSA  
GRIK1  
AKR1C1  
FABP5  
FABP4  
C1R  
SLC22A12  
THRA  
GPR139  
CDC42  
AKR1B1  
P2RX7  
PTGDR2  
FEN1  
THRB  
EGLN3  
FABP3

PLA2G1B  
PTPRG  
ERCC5  
IDO1  
DHODH  
ALOX5AP  
KMO  
CES2  
GSTA1  
NOTUM  
KCNMA1  
PTGER1  
ESR2  
FFAR1  
FDFT1  
MTNR1B  
CPA1  
ACE2  
PPARA  
PPARG  
ALOX5  
EGLN1  
MTNR1A  
MME  
FAAH  
PTGER4  
AOC3  
NR1H3  
PPARD

FFAR4  
MMP2  
MMP9  
FNTB  
GCK  
MMP13  
FNTA  
LPAR3  
PKN2  
PLA2G10  
MCL1  
SRD5A2  
CETP  
NR1H2  
RHOA  
ACE  
CES1  
ROCK1  
LPAR1  
MMP14  
CASP1  
ADAMTS4  
GSK3A  
MMP12  
MMP3  
BAD  
PRKCG  
MMP8  
KCNN4

ADAM12  
CTSK  
CTSB  
CTSS  
NTSR1  
ANPEP  
FOLH1  
PAM  
CPB2  
CPB1  
MMP1  
ENPEP  
TBXAS1  
AR  
PLA2G2A  
PLA2G4A  
PTGIR  
AKR1C4  
PTGDR  
NQO2  
TUBB1  
OXER1  
TBXA2R  
TRPM8  
STS  
KDM2A  
ELANE  
MPO  
CYP1A2

HCAR2  
SORT1  
NR4A1  
MAPK8  
KDM4C  
CTBP2  
LIG1  
RBP4  
KDM6B  
RAPGEF4  
CTSV  
KDM4D  
CSNK1A1  
KDM4E  
IDE  
MAPK10  
DYRK4  
CDC7  
CSNK2A2  
GRM4  
CDK5  
CYP26A1  
ABCG2  
SLC16A3  
CYP11B1  
CYP11B2  
KDM2B  
MMP7  
BMP1

EDNRA  
EDNRB  
MAOB  
HNF4A  
CYP17A1  
SELE  
PLAU  
APEX1  
CDC25A  
PIN1  
DBF4  
CDC25B  
GRM5  
GLRA1  
GABRA5  
BRD2  
BRD3  
BRD4  
MLYCD  
LDHA  
PTPN1  
CYP26B1  
ACHE  
PDE4D  
PDE4B  
CSNK1D  
PTPN2  
KCNA5  
SLC2A1

MAOA  
ADAM17  
ABCB1  
CAPN1  
PTGER2  
HDAC2  
ASAH1  
GLO1  
DGAT1  
FLT3  
ADORA3  
EP300  
CLK1  
HDAC3  
MIF  
BCHE  
CASP3  
CNR1  
CNR2  
PDGFRB  
CYP19A1  
MCHR1  
DYRK2  
CHRM1  
PRSS1  
GSK3B
