# Supplementary material for: Network pharmacology approach to decipher signaling pathways associated with target proteins of NSAIDs against COVID-19
Source: PubMed Central journal article supplement (PMC8100301; doi:10.1038/s41598-021-88313-5), 2021-05-05
Supplement: 41598_2021_88313_MOESM4_ESM.pdf [file 41598_2021_88313_MOESM4_ESM.pdf]

## **COVID 19-related target proteins : 466**

POLR2G

KEAP1

ALB

ATP6AP1

BACH1

BLVRA

BLVRB

CAT

CPOX

EDN1

EDNRA

ELN

FECH

FTH1

FTL

GPX1

GPX4

GSR

GTF2B  
GTF2F2  
HMOX1  
IDE  
INS  
LOXL1  
MAF  
MAT1A  
MAT2A  
NFE2L2  
SLC11A2  
NUP88  
PRDX1  
POLR2B  
POLR2E  
SOD1  
SOD2  
PRDX2  
TF

TFAM  
TFRC  
UROD  
UROS  
EIF4H  
BAG6  
NUP214  
NCOA4  
AIFM1  
COPS2  
ABCG2  
PRDX6  
NUP58  
DCAF7  
SIGMAR1  
FBLN5  
TXNRD2  
ATP5MG  
NEK6

COPS8

PRDX3

COPS6

COPS5

SPART

NUP210

SIRT3

NUP62

PRDX5

TXN2

MAT2B

DLL1

FLVCR1

SLC40A1

COPS7A

SLC15A3

NUP54

CYCS

STEAP3

DNAJC11

CAND1

UBQLN4

MCOLN1

MIB1

ATP13A3

ZNF503

NEK9

NEK7

ALG11

SLC6A19

RPL10A

CCL3

AGT

AGTR1

AGTR2

NR0B1

AKT1

ANPEP

ANXA1

APAF1

FASLG

ATF4

BAD

BAX

BCL2

BCL2L1

BDKRB1

BDKRB2

BID

BSG

BST2

C1QA

C1QB

C1QC

LDLRAD4

CASP1

CASP3

CASP7

CASP8

CASP9

CBFB

CD2

CD3E

CD3G

CD247

CD4

CD8A

CD8B

CEBPA

CEBPB

CEBPD

CEBPE

CEBPG

CFTR

CHUK

CMA1

CCR5

CPA3

CPB1

CPB2

ATF2

CRP

MAPK14

CTSD

CTSG

CTSL

CTSZ

CYP11B2

ACE

DDIT3

DDX1

S1PR1

S1PR3

EIF1AX

EIF2S1



EIF2S3  
EIF4E  
ENPEP  
ERN1  
FABP2  
FCGR1A  
FCGR2A  
FCGR2B  
FCGR3A  
FOS  
MTOR  
FYN  
GP1BA  
NR3C1  
GSTA2  
GSTM1  
GZMH  
HDAC1  
HLA

HMGB1

IFI27

IFNAR1

IFNAR2

IGHE

IGHG1

IGHG2

IGHG4

IGLC2

IGLL1

IKBKB

IL1B

IL2

IL2RA

IL6

IL6R

IL6ST

CXCL8

IL17A

CXCL10

EIF3E

IRF3

ITGAL

JAK1

JUN

JUNB

KNG1

KPNA2

RPSA

LCK

SMAD2

SMAD3

MAS1

MCL1

MAP3K4

NR3C2

MME

MYD88

PPP1R12A

PPP1R12B

NEDD4

NFKB1

NFKBIA

NOS2

NOS3

OAS1

OAS2

OAS3

OPRD1

OPRM1

PA2G4

FURIN

PHB

PIK3C3

PPARA

PPARG

PPIA

PPP1CA  
PPP1CB  
PPP1CC  
PPP1R1A  
PPP1R2  
PPP1R3A  
PPP1R3C  
PPP1R3D  
PPP1R7  
PPP1R8  
PPP1R10  
MAPK1  
MAPK3  
MAPK8  
MAPK11  
MAPK9  
MAPK10  
MAPK13  
MAP2K6

MAP2K7

EIF2AK2

PTGS1

PTGS2

RAF1

RELA

REN

RPL3

RPL4

RPL5

RPL6

RPL7

RPL7A

RPL8

RPL9

RPL11

RPL12

RPL13

RPL15

RPL17

RPL18

RPL18A

RPL19

RPL21

RPL22

RPL23A

RPL24

RPL26

RPL27

RPL30

RPL27A

RPL28

RPL29

RPL31

RPL32

RPL34

RPL35A

RPL37

RPL37A

RPL38

RPL39

RPL41

RPL36A

RPLP0

RPS2

RPS3

RPS3A

RPS4X

RPS5

RPS6

RPS6KA1

RPS6KA2

RPS6KA3

RPS7

RPS8

RPS9

RPS10



RPS11

RPS12

RPS13

RPS14

RPS15

RPS15A

RPS16

RPS17

RPS18

RPS19

RPS20

RPS21

RPS23

RPS24

RPS25

RPS26

RPS27

RPS27A

RPS28



TRAF6  
TYK2  
UBA52  
VEGFA  
XBP1  
ZAP70  
ULK1  
CUL2  
IKBKG  
EIF3A  
EIF3B  
EIF3C  
EIF3D  
EIF3F  
EIF3H  
EIF3I  
BECN1  
S1PR4  
MBTPS1

RIPK1  
FADD  
NR1I2  
NAE1  
EIF2S2  
UBA3  
RPL14  
FCGR2C  
ATG12  
RPL23  
EIF2AK3  
ISG15  
IKBKE  
ULK2  
ATG13  
RB1CC1  
RBX1  
BCL2L11  
CEBPZ

ATP6AP2

CALCRL

EIF1

IRF9

PRG3

RACK1

EIF3M

ATG7

RPL35

PHB2

ATF6

PPP1R13B

RPL13A

PADI4

DDX58

PPP1R15A

IL17RA

RPL36

PPP1R16B

PPP1R14B  
BBC3  
EIF3K  
TRBC1  
TRAC  
PYCARD  
TBK1  
PIK3R4  
TLR7  
MBTPS2  
EIF3L  
ZFYVE1  
S1PR5  
TLR9  
PPP1R12C  
PPP1R14D  
ATG16L1  
WIP1  
PPP1R9A

TSR1  
NKRF  
PMEPA1  
MAVS  
ACE2  
IFIH1  
MMP25  
MPP5  
ATG3  
PPP1R3B  
ZYG11B  
PPP1R14C  
ATG10  
EIF2A  
PPP1R1B  
MAP1LC3A  
PPP1R9B  
IL17RC  
AOPEP

PPP1R15B  
PPP1R16A  
PPP1R3F  
PPP1R3E  
PPP1R14A  
IL17F  
NLRP3  
CCDC124  
ATG4A  
RPL10L  
TICAM1  
PPP1R1C  
PIKFYVE  
TUBB  
TPCN2  
TREML4  
PTPRS  
PPP1R3G  
E



MMP5  
S  
ORF3a  
M  
ORF6  
ORF7a  
ORF7b  
N  
ORF10  
ORF8  
ORF1ab

**target proteins**
