# Supplementary material for: Network pharmacology approach to decipher signaling pathways associated with target proteins of NSAIDs against COVID-19
Source: PubMed Central journal article supplement (PMC8100301; doi:10.1038/s41598-021-88313-5), 2021-05-05
Supplement: 41598_2021_88313_MOESM5_ESM.pdf [file 41598_2021_88313_MOESM5_ESM.pdf]

**The final 26 overlapping target proteins**

---

PTGS2

MAPK14

PTGS1

NR3C2

PPP1CA

CXCL8

FABP2

ACE2

PPARA

PPARG

MME

MCL1

ACE

CASP1

BAD

ANPEP

CPB2

CPB1

ENPEP

MAPK8

IDE

MAPK10

ABCG2

CYP11B2

EDNRA

CASP3
